# Supplementary material
Source: Elsevier journal article supplement (https://rcastoragev2.blob.core.windows.net/7a4f4c67a2a6cef978e83557432efedb/mmc1.pdf)
Supplement: mmc1 [file mmc1.pdf]

## Supplemental Data

### Interleukin-10 Production by Th1 Cells Requires

### Interleukin-12-Induced STAT4 Transcription Factor

### and ERK MAP Kinase Activation by High Antigen Dose

Margarida Saraiva, Jillian R. Christensen, Marc Veldhoen, Theresa L. Murphy, Kenneth M. Murphy, and Anne O'Garra

| Table S1. Cellular fold recovery after 7 days culture |                     |                   |                           |
|-------------------------------------------------------|---------------------|-------------------|---------------------------|
| 0.7 $\mu$ M                                           | 0.7 $\mu$ M + IL-12 | 0.01/0.05 $\mu$ M | 0.01/0.05 $\mu$ M + IL-12 |
| 35                                                    | 20                  | 6.7               | 2.3                       |
| 35.2                                                  | 22                  | 9.2               | 6                         |
| 74.6                                                  | 30.9                | 14.1              | 4.6                       |
| 46                                                    | 28                  | 5.5               | 2.6                       |

**Table S1. Cellular fold recovery after 7 days culture.**

CD4<sup>+</sup> T cells from DO11.10 TCR transgenic animals were isolated and differentiated for 7 days as indicated and the fold recovery determined for various experiments performed. Mean $\pm$ SD is indicated from results of 3 separate experiments.

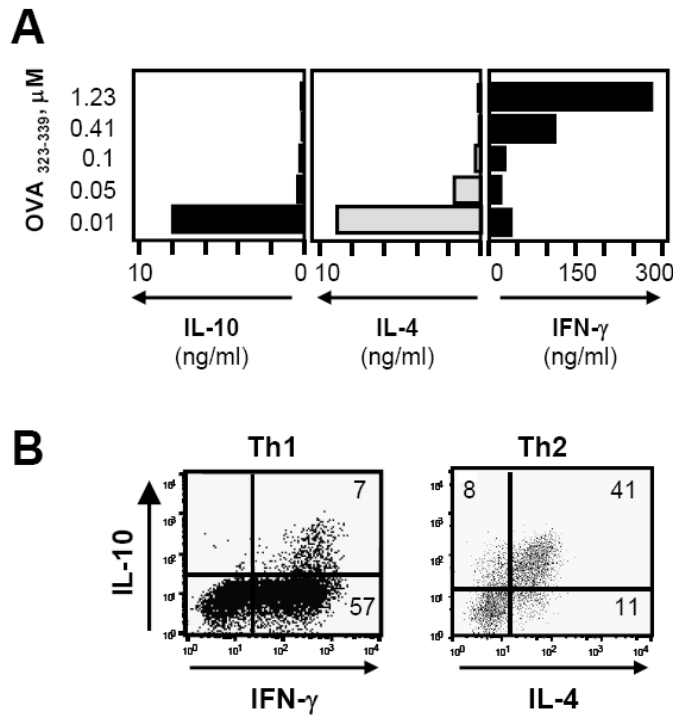

**Figure S1. High antigen dose-induced Th1 cells do not express IL-10, but IL-12-induced Th1 cells in an APC-free system do.**

(A) CD4<sup>+</sup> T cells from DO11.10 TCR transgenic animals were isolated and differentiated for 7 days with splenic DC, in medium containing increasing doses of OVA as indicated. On day 7, cells were harvested and restimulated for 48h in the presence of plate bound anti-CD3 and soluble anti-CD28. The culture supernatants were analyzed by ELISA for the production of IL-10, IFN- $\gamma$  and IL-4. (B) CD4<sup>+</sup> T cells were cultured for 1 week in the presence of plate bound anti-CD3 soluble anti-CD28 with IL-12 and anti-IL-4 antibody (Th1) or with IL-4 (Th2). On day 7, cells were restimulated for 4h in the presence of BrefeldinA and stained at the single cell level for IL-10, IFN- $\gamma$  and IL-4. Data is representative of 10 experiments performed.

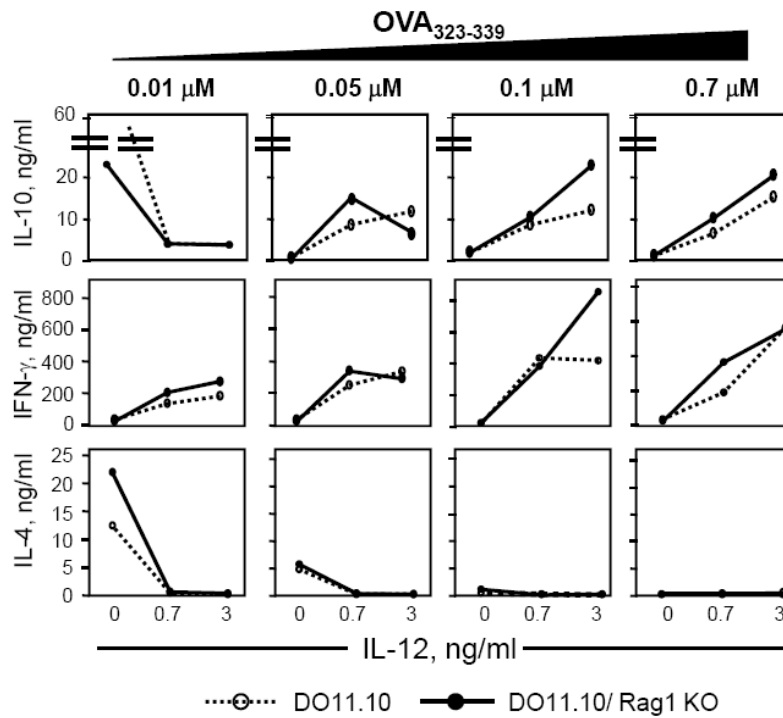

**Figure S2. Induction of IL-10 in Th1 cells by IL-12 at high antigen dose is not dependent on effector cells.**

CD4<sup>+</sup> T cells from DO11.10 TCR transgenic or DO11.10/Rag1 deficient mice were isolated, differentiated for 7 days and restimulated as in Figure 1. Cytokine production was detected by ELISA and representative results are shown from two different experiments.

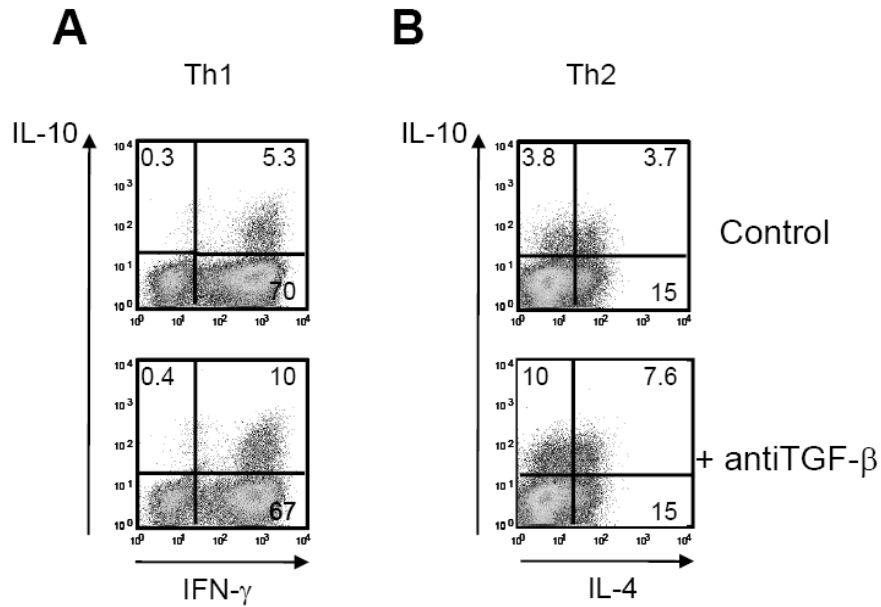

**Figure S3. Neutralization of TGF- $\beta$  enhances IL-10 production by both Th1 and Th2 cells.**

CD4<sup>+</sup> T cells were isolated and cultured for 5 days in the presence of plate bound anti-CD3, soluble anti-CD28 and IL-12 (3ng/ml) plus anti-IL-4 (20 $\mu$ g/ml), Th1; or IL-4 (10ng/ml) plus anti-IL-12 (10 $\mu$ g/ml), Th2; in the absence (Control) or presence of a TGF- $\beta$  neutralizing antibody (10 $\mu$ g/ml; + anti-TGF- $\beta$ ). On day 5, cells were restimulated with PdBU and Ionomycin and the expression of IL-10, IFN- $\gamma$  and IL-4 was detected by ICS. Representative results are shown from 4 experiments.

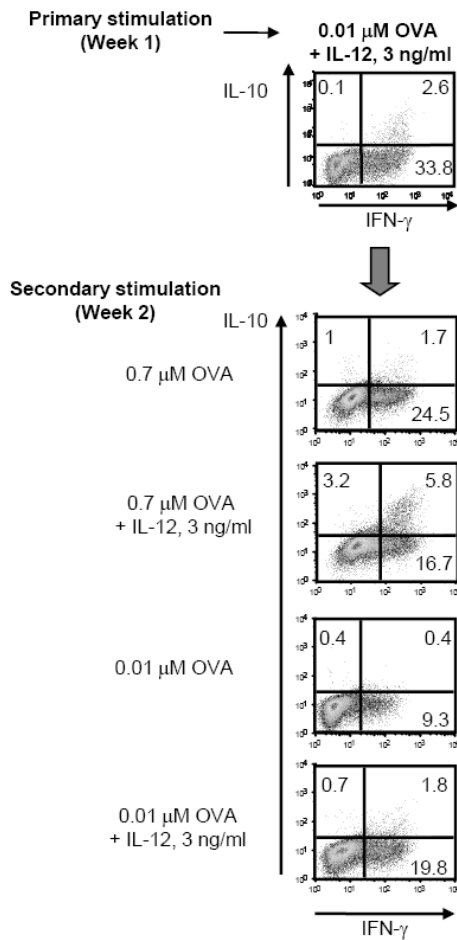

**Figure S4. Repeated low antigen dose stimulation does not give rise to IL-10 expression by Th1 cells, but can be rescued by high antigen dose and IL-12.**

CD4<sup>+</sup> T cells from DO11.10 TCR transgenic animals were cultured for 1 week in the presence of low (0.01 $\mu$ M) dose of OVA and DC plus IL-12, and then harvested, counted and re-cultured for a second week as indicated. At the end of the first and the second weeks, cells were restimulated with anti-CD3 and anti-CD28 and IFN- $\gamma$  and IL-10 cytokine expression detected by ICS, as described before. Representative results are shown from 2 different experiments.

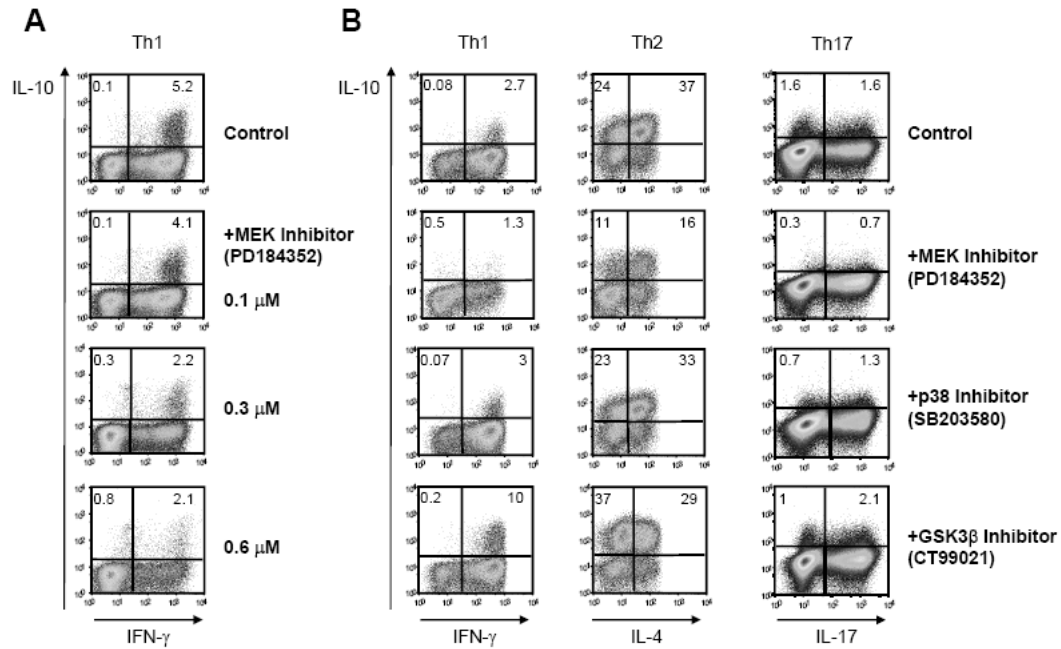

**Figure S5. IL-10 production by Th1, Th2 and Th17 cells is inhibited by the MEK inhibitor, but not by a p38 inhibitor, nor a GSK3 $\beta$  inhibitor.**

CD4<sup>+</sup> T cells were isolated and cultured for 7 days in the presence of plate bound anti-CD3, anti-CD28 and IL-12 (3ng/ml), Th1; IL-4 (10ng/ml) plus anti-IFN- $\gamma$  (10 $\mu$ g/ml), Th2; or IL-6 (50ng/ml), TGF- $\beta$  (1ng/ml) and IL-1 (10ng/ml), Th17; all in the absence (Control) or presence of PD184352 MEK Inhibitor (0.1, 0.3, 0.6 $\mu$ M in A and 1 $\mu$ M in B), SB203580 p38 Inhibitor (1 $\mu$ M) or CT99021 GSK3 $\beta$  Inhibitor (1 $\mu$ M). On day 5 or 7, cells were restimulated and the expression of IL-10, IFN- $\gamma$ , IL-4 and IL-17 was detected by ICS.

**Experimental flowchart used for Figures 1, 2 and 6A and 6B and Figures S1 and S2**

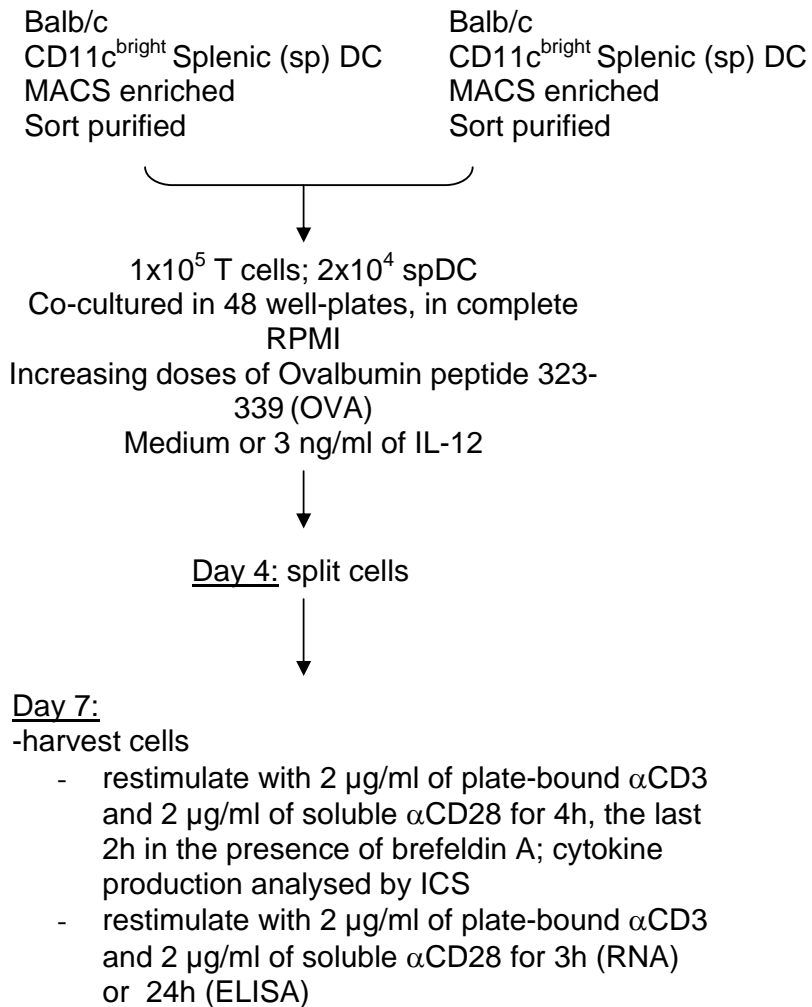

**Experimental flowchart used for Figure 4 and Figure S4**

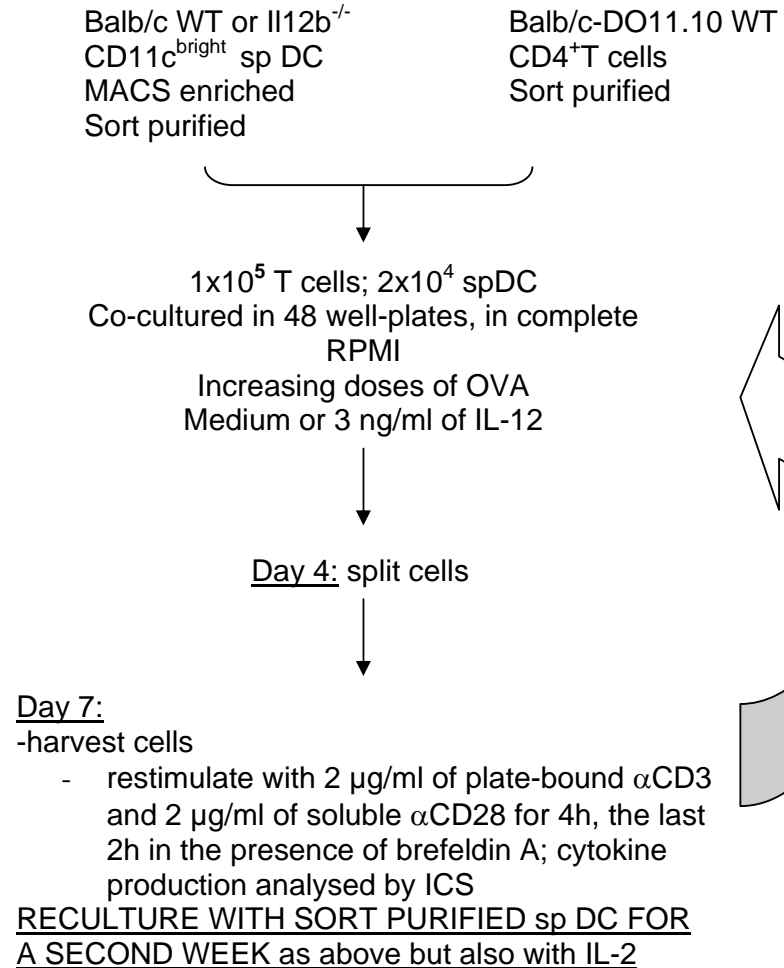

Low antigen dose-driven Th2: 0.05 µM OVA; no IL-4 \* IL-4-driven Th2: IL-4 at 10 ng/ml; αIL-12 at 10 µg/ml; 1 µM OVA

**Experimental flowchart used for Figures 5C and 5D, 6C and 6D and Figures S3 and S5**

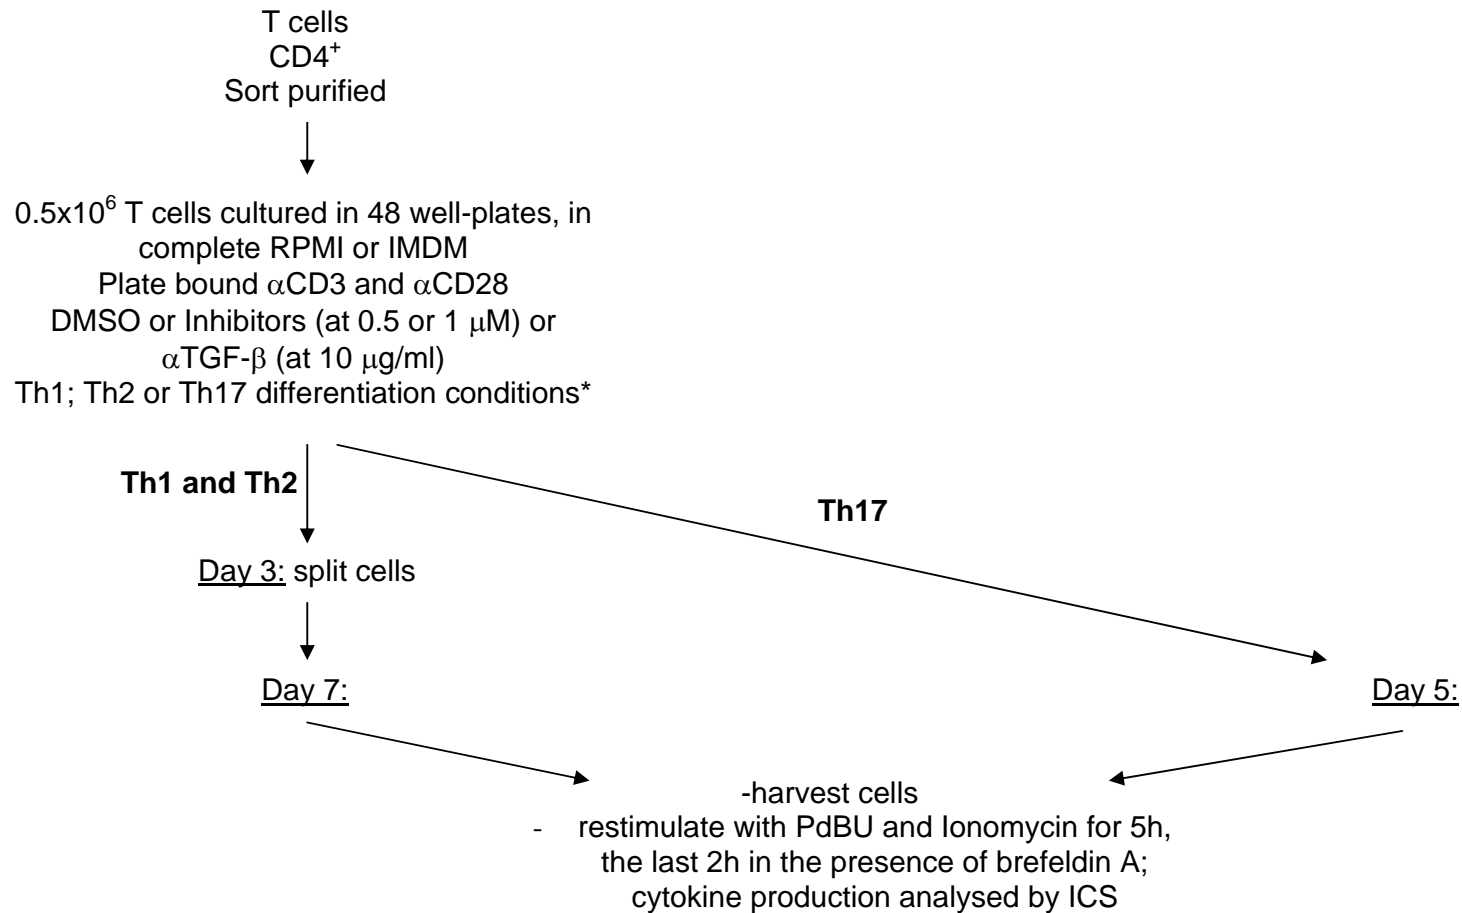

\* Th1: IL-12 at 3 ng/ml;

\* Th2: IL-4 at 10 ng/ml;

\* Th17: IL-6 at 50 ng/ml; TGF-β at 1 ng/ml; IL-1 at 10 ng/ml

**Supplementary Figures 6 and 7: Schematic representation of the experimental design used in this work.**
